# Supplementary material for: The ATPase activity of Asna1/TRC40 is required for pancreatic progenitor cell survival
Source: PubMed Central journal article supplement (PMC5825870; doi:10.1242/dev.154468), 2018-01-01
Supplement: develop-145-154468-s1.pdf [file develop-145-154468-s1.pdf]

## SUPPLEMENTARY INFORMATION

### Supplementary Methods

#### Western blot analysis

Tissue were collected in lysis buffer (2%SDS in 100mM Tris-HCl pH6.8), sonicated, and cleared by centrifugation. Protein expression was probed on western blots using antibodies (Table S1) diluted in blocking buffer (2.5% BSA in TBSTw [20mM Tris-HCl pH7.4, 0.15M NaCl, 0.1% Tween-20]) and quantified using chemiluminescent detection in ChemiDoc™ MP system (BioRad, #170-8280) followed by densitometry analyses of bands on Image Lab 4.1 using expression of  $\alpha$ -tubulin to normalize expression levels.

**Table S1. Primary antibodies**

| Antigen            | Species    | Supplier                                      | Dilution         |
|--------------------|------------|-----------------------------------------------|------------------|
| Amylase            | Rabbit     | Sigma-Aldrich #A8273                          | 1:4000           |
| Atf4               | Rabbit     | Cell Signaling #11815                         | 1:100            |
| cleaved Caspase-3  | Rabbit     | Cell Signaling #9661                          | 1:1000           |
| CPA                | Rabbit     | Serotec #1810-0006                            | 1:2000           |
| DBA lectin         | NA         | Vector laboratories #FL1031                   | 1:100            |
| EEA1               | Mouse      | Novus Biologicals #H00008411-M02              | 1:1000           |
| ERGIC53            | Rabbit     | Sigma #E1031                                  | 1:200            |
| E-cad              | Rat        | Zymed #13-1900                                | 1:1000           |
| Giantin            | Rabbit     | Abcam #ab24586                                | 1:3000           |
| Glucagon           | Guinea pig | Linco #4031-01F                               | 1:1000           |
| Gm130              | Mouse      | BD Transduction Lab #610813                   | 1:200            |
| Insulin            | Guinea pig | Dako #A0564                                   | 1:500            |
| Ipf1               | Rabbit     | Produced in house (Ohlsson et al., 1993)      | 1:800            |
| KDEL               | Mouse      | Abcam #ab12223                                | 1:200            |
| Lamp1              | Rabbit     | Novus Biologicals #NB120-19294                | 1:200            |
| Ngn3               | Rabbit     | Produced in house (Selander and Edlund, 2002) | 1:800            |
| P53                | Mouse      | Abcam #ab187820                               | 1:1000*          |
| p62                | Guinea pig | ProGen #GP62-C                                | 1:800            |
| Phospho-Histone H3 | Rabbit     | Upstate # 06-570                              | 1:1000           |
| Ptf1a              | Rabbit     | Produced in house (Li and Edlund, 2001)       | 1:800            |
| Sec22b             | Rabbit     | Osenses #OSS00040W                            | 1:200            |
| Sec61 $\beta$      | Rabbit     | Proteintech #15087-1-AP                       | 1:100            |
| Sox9               | Rabbit     | Millipore # ab5535                            | 1:1000           |
| Stx5               | Rabbit     | Synaptic System #110 053.                     | 1:400<br>1:5000* |
| Stx6               | Mouse      | BD Transduction Lab #610635                   | 1:100            |
| TGN46              | Rabbit     | Abcam #ab16059                                | 1:200            |
| $\alpha$ -tubulin  | Mouse      | Sigma-Aldrich #T5168                          | 1:10000*         |

\* dilution for western blot

**Table S2. Primers used in qRT-PCR analyses**

| Gene             | Forward (5'-3')              | Reverse (5'-3')                  |
|------------------|------------------------------|----------------------------------|
| Asna1<br>(exon2) | TTCCACAGACCCAGCTCACAA        | GCCTTTGACCTTGGTAGGCA<br>C        |
| Atf3             | GTGTCGAAACAAGAAAAGGAG<br>AAG | TCTCTGACTCTTTCTGCAGG<br>CAC      |
| Atf4             | GGAATGGCCGGCTATGG            | TCCCGGAAAAGGCATCCT               |
| BiP              | TCAGCCAATTATCAGCAAACCTCT     | TTTTCTGATGTATCCTCTTCA<br>CCAGT   |
| Chop10           | CAGAAGGAAGTGCATCTTCATA<br>C  | GACTGCACGTGGACCAGGTT<br>C        |
| Dnajc3           | GACAGCTAGCCGACGCCTTA         | GTCACCATCAACTGCAGCGT             |
| Herpud1          | CATGTACCTGCACCACGTGC         | GAGGACCACCATCATCCGG              |
| HO-1             | CTAGCCCCAGTCCGGTGATG         | CAAATCCTGGGGCATGCTG              |
| Hsp90b1          | TGTATGTACGCCGCGTATTCA        | TCGGAATCCACAACACCTTT<br>G        |
| Nrf2             | TTTCAGCGTGGCTGGGGATA         | TGACCATGAGTCGCTTGCCC             |
| Nqo1             | CGCCTGAGCCCAGATATTGT         | CTGCAATGGGAACTGAAATA<br>TCAC     |
| Pdia4            | TGACCCGGCCTACTTGCA           | GTGTGGTGAAACTTGTAATC<br>TTCTCTCA |
| Tbp              | GAATTGTACCGCAGCTTCAAAA       | AGTGCAATGGTCTTTAGGTC<br>AAGTT    |
| Trib3            | ACTGTGAGAGGACGAAGCTGG        | TCACGCAGGCATCTTCCA               |
| XBP1-<br>spliced | CTGAGTCCGCAGCAGGTGCAG        | GTCCATGGGAAGATGTTCTG<br>G        |

**Table S3. Primers used for PCR genotyping.**

| Genotyping primers (5'-3') |                                   |
|----------------------------|-----------------------------------|
| Asna-exon2-196F            | TGTCGAAGGGACGTGAGAGTG             |
| Asna-G4R                   | TGGTGGCTGCTGGTAGGTA               |
| ASNA_G_WT-A                | GGGCAAAGCGAACTGA                  |
| IPF1-5'3                   | GGGAAGAGGAGATGTAGACTT             |
| IPF1-AR                    | GAGCTGAGCTGGAAGGT                 |
| CRE1                       | GTGCAAAACAGGCTCTAG                |
| GFP(LC3)                   | TCCTGCTGGAGTTCGTGACCG             |
| LC3*rc3                    | TTGCGAATTCTCAGCCGTCTTCATCTCTCTCGC |
| mLC3ex3GT                  | TGAGCGAGCTCATCAAGATAATCAGGT       |
| mLC3ex4AG                  | GTTAGCATTGAGCTGCAAGCGCCGTCT       |
| ATG5exon3-1                | GAATATGAAGGCACACCCCTGAAATG        |
| ATG5check                  | ACAACGTCGAGCACAGCTGCGCAAGG        |
| ATG5short                  | GTA CTGCATAATGGTTTAACTCTTGC       |

## Figure S1 (related to Figure 1)

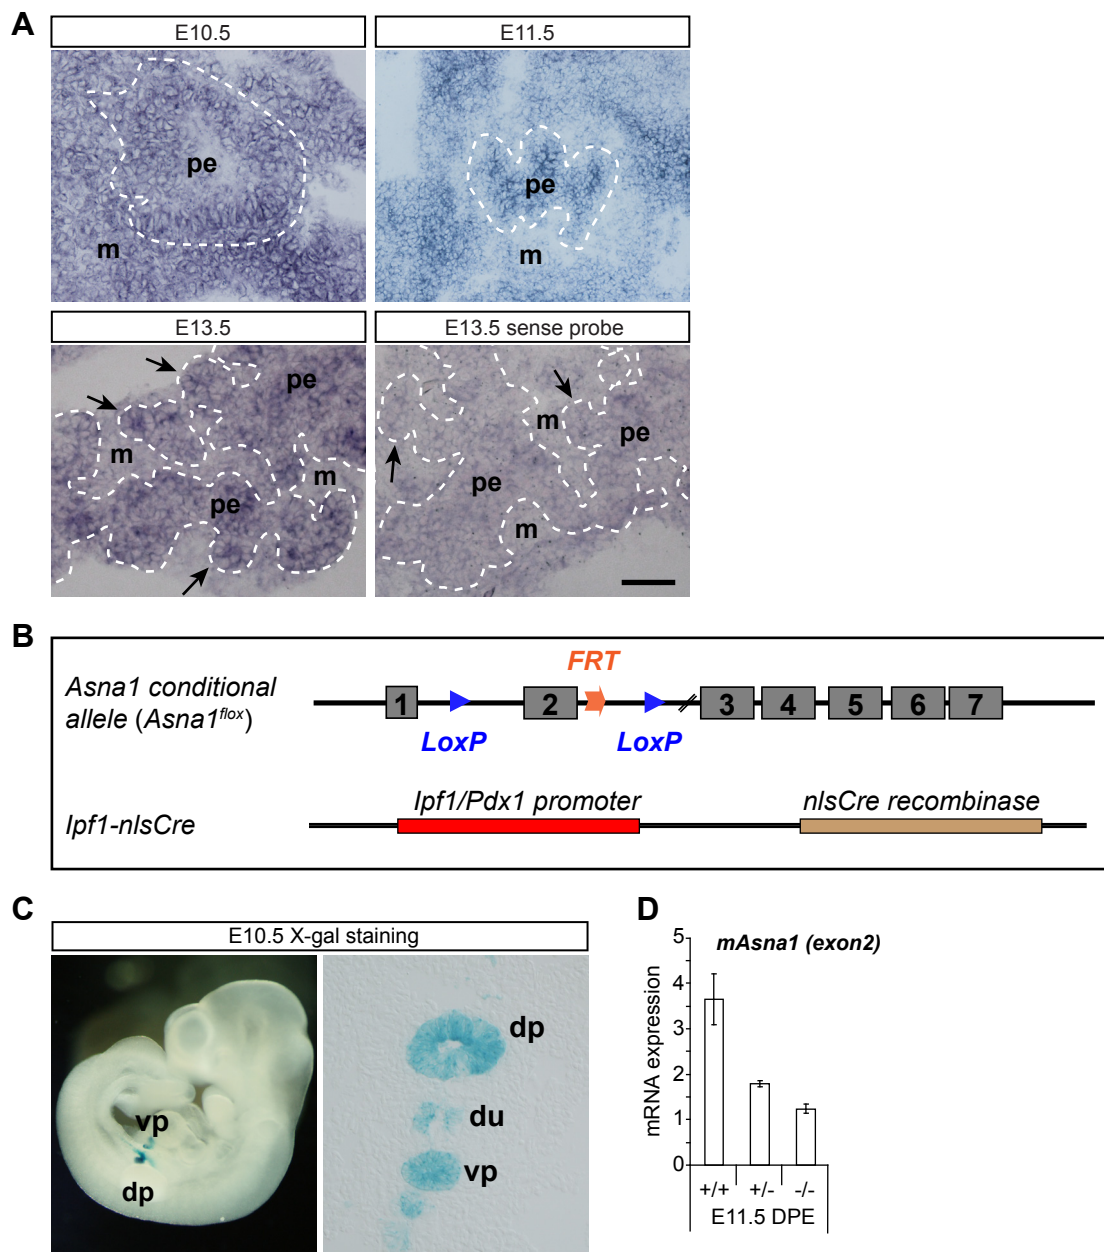**Fig. S1.**

(A) *In situ* hybridization using *Asna1* antisense and sense probes showing expression of *Asna1* in the pancreatic epithelium of E10.5-E13.5 wildtype embryos.

(B) Schematic presentation of the conditional *Asna1* allele (*Asna1<sup>lox</sup>*) and the *Ipfl-nlsCre* transgenic construct used to generate *Asna1<sup>Panc-/-</sup>* mice.

(C) X-gal staining of E10.5 *Ipfl-nlsCre; Rosa26<sup>loxP-stop-loxP-LacZ</sup>* (Soriano, 1999) embryos showing *Ipfl/CRE* mediated reporter, i.e. LacZ, expression in pancreatic and duodenal progenitor epithelia.

(D) qRT-PCR analysis of *Asna1(exon2)* expression in dorsal pancreatic epithelium stripped of mesenchyme (DPE) isolated from E11.5 *Asna1<sup>Panc+/+</sup>*, *Asna1<sup>Panc+/-</sup>* and *Asna1<sup>Panc-/-</sup>* mice (n=4).

Scale bar in (A), 50µm. Dashed lines in (A) delimit pancreatic epithelia. Arrows in (A) indicate proacinar tip cells. dp, dorsal pancreas; du, duodenum; m, mesenchyme; pe, pancreatic epithelium; vp, ventral pancreas.

## Figure S2 (related to Figure 1)

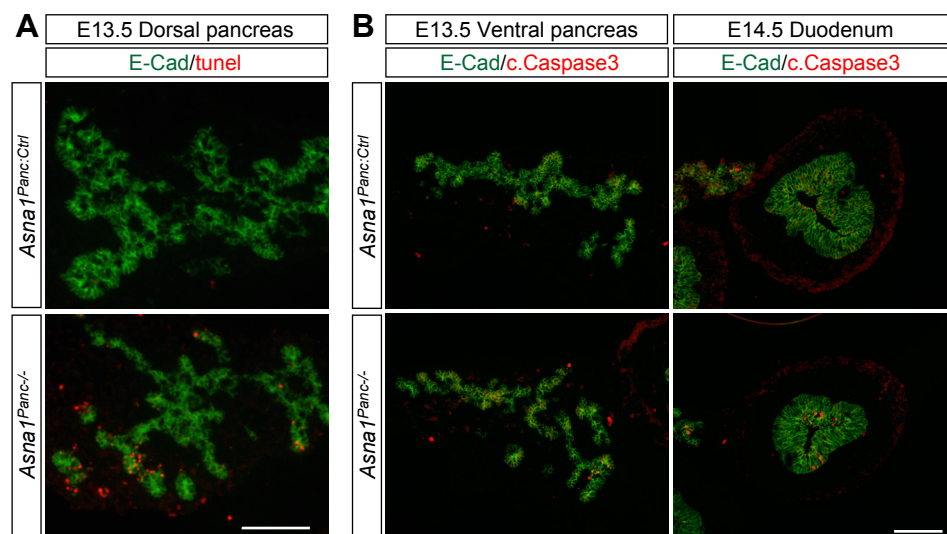**Fig. S2.**

(A) Combined tunel staining and immunohistochemistry of dorsal pancreatic sections from E13.5 *Asna1<sup>Panc:Ctrl</sup>* and *Asna1<sup>Panc-/-</sup>* embryos (n=2) using tunel assay to detect DNA fragmentation (red) in apoptotic cells combined with antibodies against E-cadherin (E-cad; green) to detect pancreatic epithelium.

(B) Immunohistochemistry of E13.5 ventral pancreas and E14.5 duodenum from *Asna1<sup>Panc:Ctrl</sup>* and *Asna1<sup>Panc-/-</sup>* embryos (n=3) using antibodies against E-cadherin (E-cad; green) and cleaved Caspase3 (c.Caspase3; red).

Scalebar, 100µm in (A and B)

### Figure S3 (related to Figure 2)

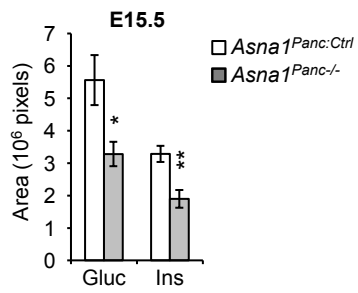

**Fig. S3.**

Quantification of total glucagon<sup>+</sup> (Gluc) and insulin<sup>+</sup> (Ins) area in the DPE from *Asna1<sup>Panc:Ctrl</sup>* and *Asna1<sup>Panc-/-</sup>* embryos at E15.5 (n=5 respectively).

Data are presented as mean±SEM, \*p<0.05, \*\*p<0.01, (student *t* test).

### Figure S4 (related to Figure 3)

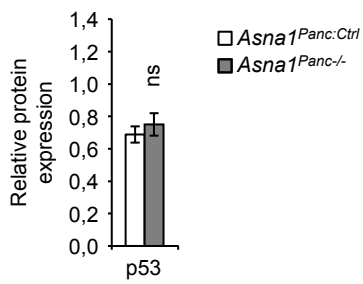

#### Fig. S4.

Western blot quantification of p53 protein levels relative to  $\alpha$ -tubulin in E13.5 dorsal pancreas buds from *Asna1<sup>Panc:Ctrl</sup>* (n=6) and *Asna1<sup>Panc-/-</sup>* embryos (n=3). Data are presented as mean $\pm$ SEM, ns=not significant (student t test).



## Figure S5 (related to Figure 4)

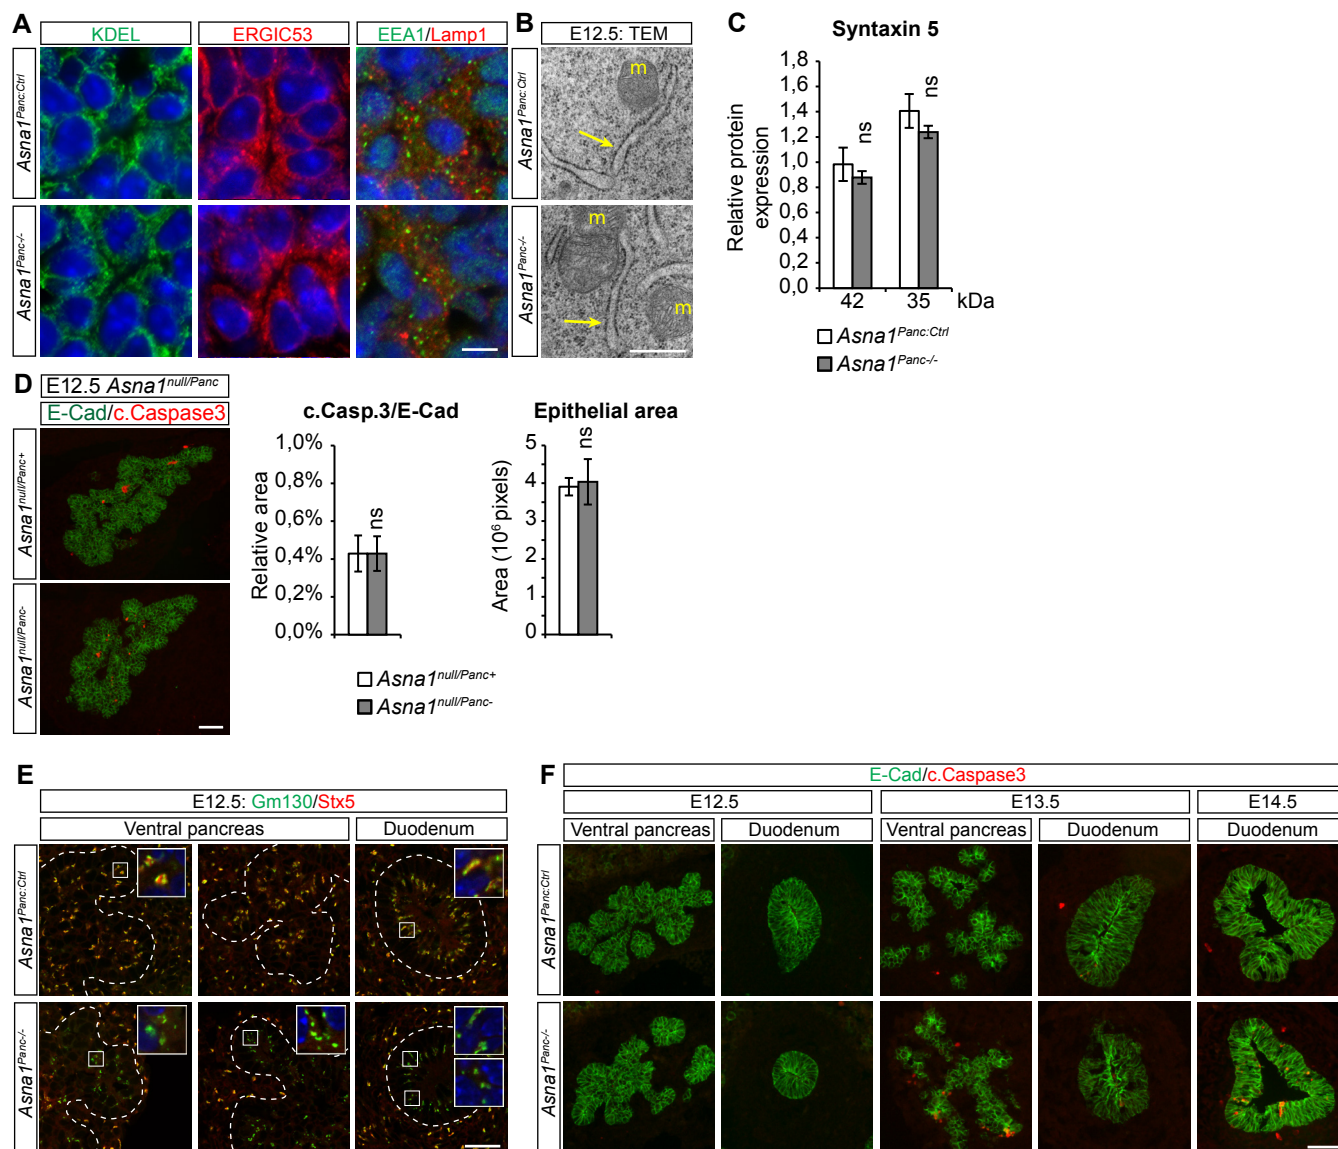

Fig. S5.

(A) Immunohistochemistry of dorsal pancreatic sections from E12.5 *Asna1<sup>Panc:Ctrl</sup>* and *Asna1<sup>Panc-/-</sup>* embryos (n=3) using antibodies against KDEL (green), ERGIC (red), EEA1 (green) and Lamp1 (red).

(B) Transmission electron micrograph (TEM) of dorsal pancreatic sections from E12.5 *Asna1<sup>Panc:Ctrl</sup>* and *Asna1<sup>Panc-/-</sup>* embryos (n=3) showing mitochondria (m) and rough ER (yellow arrows).

(C) Western blot quantification of the 35kDa and 42kDa isoforms of Stx5 protein levels relative  $\alpha$ -tubulin in E12.5 dorsal pancreas buds from *Asna1<sup>Panc:Ctrl</sup>* (n=3) and *Asna1<sup>Panc-/-</sup>* embryos (n=3).

(D) Representative immunohistochemistry and quantification of dorsal pancreas from E12.5 *Asna1<sup>null/Panc+</sup>* and *Asna1<sup>null/Panc-</sup>* (n=3) using antibodies against E-cadherin (E-cad; green) and cleaved Caspase 3 (c.Caspase3; red).

(E) Immunohistochemistry of ventral pancreas and duodenum from E12.5 *Asna1<sup>Panc:Ctrl</sup>* and *Asna1<sup>Panc-/-</sup>* embryos (n=3) using antibodies against Gm130 (green) and Stx5 (red). Insets show magnification of selected areas (squares). Stx5 expression is reduced in the Golgi of E12.5 *Asna1<sup>Panc-/-</sup>* ventral pancreas and duodenum. To illustrate different degrees of Golgi fragmentation (Gm130 in green) at this stage, the ventral pancreas from two different animals are shown and two regions of the *Asna1<sup>Panc-/-</sup>* duodenal epithelium are magnified (insets).

(F) Immunohistochemistry of ventral pancreas and duodenum from E12.5, E13.5 and E14.5 *Asna1<sup>Panc:Ctrl</sup>* and *Asna1<sup>Panc-/-</sup>* embryos (n=3) using antibodies against E-cadherin (E-cad; green) and cleaved Caspase 3 (c.Caspase3; red). Increased number of c.Caspase3<sup>+</sup> apoptotic cells are observed at E13.5 in the ventral pancreas and at E14.5 in the duodenum, which is 1-2 days after the first signs of perturbed Golgi morphology and Stx5 expression (compare with panel [E]).

DAPI (blue) indicate nuclei in (A). Dashed lines in (E) delimit pancreatic or duodenal epithelia. Scalebars: 10 $\mu$ m in (A), 0.5 $\mu$ m in (B), 50 $\mu$ m in (D and F), and 25 $\mu$ m in (E).
